# Supplementary material
Source: PubMed Central journal article supplement (PMC2768040)
Supplement: NIHMS80401-supplement-01.pdf [file NIHMS80401-supplement-01.pdf]

## Supplemental Data

## Signal Transducer and Activator of Transcription 4

## Is Required for the Transcription Factor T-bet

## to Promote T Helper 1 Cell Fate Determination

Vivian T. Thieu, Qing Yu, Hua-Chen Chang, Norman Yeh, Evelyn T. Nguyen, Sarita Sehra, and Mark H. Kaplan

Table S1

Transcription factor requirements for Th1 specific expression

| Gene                 | Protein               | Stat4-dependency                                | T-bet-dependency                  |
|----------------------|-----------------------|-------------------------------------------------|-----------------------------------|
| <i>Ifng</i>          | IFN $\gamma$          | (Kaplan et al., 1996; Thierfelder et al., 1996) | (Szabo et al., 2002)              |
| <b><i>Lta</i></b>    | Lymphotoxin- $\alpha$ | This report                                     | This report                       |
| <b><i>Xcl1</i></b>   | Lymphotoxin           | (Zhang et al., 2000)                            | This report                       |
| <i>Hlx1</i>          | Hlx                   | This report                                     | (Martins et al., 2005)            |
| <i>Etv5</i>          | ERM                   | (Ouyang et al., 1999)                           | This report                       |
| <b><i>Egr2</i></b>   | Egr2                  | This report                                     | This report                       |
| <b><i>Egr3</i></b>   | Egr3                  | This report                                     | This report                       |
| <i>Runx3</i>         | Runx3                 | This report                                     | (Djuretic et al., 2007)           |
| <u><i>Twist1</i></u> | Twist1                | (Niesner et al., 2008)                          | (Niesner et al., 2008)            |
| <i>Il12rb2</i>       | IL-12R $\beta$ 2      | (Lawless et al., 2000)                          | (Usui et al., 2006)               |
| <i>Il18r1</i>        | IL-18R $\alpha$       | (Lawless et al., 2000)                          | This report                       |
| <i>Il18rap</i>       | IL-18R $\beta$        | (Nakahira et al., 2001)                         | This report                       |
| <i>Ccr5</i>          | CCR5                  | (Iwasaki et al., 2001)                          | (Lord et al., 2005) – this report |
| <b><i>Cxcr3</i></b>  | CXCR3                 | (Nakajima et al., 2002)                         | (Lord et al., 2005)               |
| <b><i>Fut7</i></b>   | FucTVII               | (White et al., 2001)                            | (Underhill et al., 2005)          |
| <i>St3gal6</i>       | ST3GalVI              | (Underhill et al., 2005)                        | (Underhill et al., 2005)          |
| <i>Gcnt1</i>         | C2GlcNacT             | (White et al., 2001)                            | (Underhill et al., 2005)          |
| <u><i>Furin</i></u>  | Furin                 | (Pesu et al., 2006)                             | This report                       |

*Gene*-dependent on Stat4 and T-bet

***Gene***-dependent on T-bet

*Gene*-dependent on Stat4

Table S1 References

- Djuretic, I. M., Levanon, D., Negreanu, V., Groner, Y., Rao, A., and Ansel, K. M. (2007). Transcription factors T-bet and Runx3 cooperate to activate Ifng and silence Il4 in T helper type 1 cells. *Nat Immunol* 8, 145-153.
- Iwasaki, M., Mukai, T., Nakajima, C., Yang, Y. F., Gao, P., Yamaguchi, N., Tomura, M., Fujiwara, H., and Hamaoka, T. (2001). A mandatory role for STAT4 in IL-12 induction of mouse T cell CCR5. *J Immunol* 167, 6877-6883.
- Kaplan, M. H., Sun, Y.-L., Hoey, T., and Grusby, M. J. (1996). Impaired IL-12 responses and enhanced development of Th2 cells in Stat4-deficient mice. *Nature* 382, 174-177.
- Lawless, V. A., Zhang, S., Ozes, O. N., Bruns, H. A., Oldham, I., Hoey, T., Grusby, M. J., and Kaplan, M. H. (2000). Stat4 regulates multiple components of IFN- $\gamma$ -inducing signaling pathways. *J Immunol* 165, 6803-6808.
- Lord, G. M., Rao, R. M., Choe, H., Sullivan, B. M., Lichtman, A. H., Luscinskas, F. W., and Glimcher, L. H. (2005). T-bet is required for optimal proinflammatory CD4+ T-cell trafficking. *Blood* 106, 3432-3439.
- Martins, G. A., Hutchins, A. S., and Reiner, S. L. (2005). Transcriptional activators of helper T cell fate are required for establishment but not maintenance of signature cytokine expression. *J Immunol* 175, 5981-5985.
- Nakahira, M., Tomura, M., Iwasaki, M., Ahn, H.-J., Blan, Y., Hamaoka, T., Ohta, T., Kurimoto, M., and Fujiwara, H. (2001). An absolute requirement for Stat4 and a role for IFN- $\gamma$  as an amplifying factor in IL-12 induction of the functional IL-18 receptor complex. *J Immunol* 167.
- Nakajima, C., Mukai, T., Yamaguchi, N., Morimoto, Y., Park, W. R., Iwasaki, M., Gao, P., Ono, S., Fujiwara, H., and Hamaoka, T. (2002). Induction of the chemokine receptor CXCR3 on TCR-stimulated T cells: dependence on the release from persistent TCR-triggering and requirement for IFN-gamma stimulation. *Eur J Immunol* 32, 1792-1801.
- Niesner, U., Albrecht, I., Janke, M., Doebeis, C., Loddenkemper, C., Lexberg, M. H., Eulenburg, K., Kreher, S., Koeck, J., Baumgrass, R., *et al.* (2008). Autoregulation of Th1-mediated inflammation by twist1. *J Exp Med* 205, 1889-1901.
- Ouyang, W., Jacobson, N. G., Bhattacharya, D., Gorham, J. D., Fenoglio, D., Sha, W. C., Murphy, T. L., and Murphy, K. M. (1999). The Ets transcription factor ERM is Th1-specific and induced by IL-12 through a Stat4-dependent pathway. *Proc Natl Acad Sci U S A* 96, 3888-3893.
- Pesu, M., Muul, L., Kanno, Y., and O'Shea, J. J. (2006). Proprotein convertase furin is preferentially expressed in T helper 1 cells and regulates interferon gamma. *Blood* 108, 983-985.
- Szabo, S. J., Sullivan, B. M., Stemmann, C., Satoskar, A. R., Sleckman, B. P., and Glimcher, L. H. (2002). Distinct effects of T-bet in TH1 lineage commitment and IFN-gamma production in CD4 and CD8 T cells. *Science* 295, 338-342.
- Thierfelder, W. E., van Deursen, J. M., Yamamoto, K., Tripp, R. A., Sarawar, S. R., Carson, R. T., Sangster, M. Y., Vignali, D. A. A., Doherty, P. C., Grosveld, G. C., and Ihle, J. N. (1996). Requirement for Stat4 in interleukin-12 mediated responses of natural killer and T cells. *Nature* 382, 171-174.
- Underhill, G. H., Zisoulis, D. G., Kolli, K. P., Ellies, L. G., Marth, J. D., and Kansas, G. S. (2005). A crucial role for T-bet in selectin ligand expression in T helper 1 (Th1) cells. *Blood* 106, 3867-3873.

Usui, T., Preiss, J. C., Kanno, Y., Yao, Z. J., Bream, J. H., O'Shea, J. J., and Strober, W. (2006). T-bet regulates Th1 responses through essential effects on GATA-3 function rather than on IFNG gene acetylation and transcription. *J Exp Med* *203*, 755-766.

White, S. J., Underhill, G. H., Kaplan, M. H., and Kansas, G. S. (2001). Cutting edge: differential requirements for Stat4 in expression of glycosyltransferases responsible for selectin ligand formation in Th1 cells. *J Immunol* *167*, 628-631.

Zhang, S., Lukacs, N. W., Lawless, V. A., Kunkel, S. L., and Kaplan, M. H. (2000). Differential expression of chemokines in Th1 and Th2 cells is dependent on Stat6 but not Stat4. *J Immunol* *165*, 10-14.

Table S2

Primers used for ChIP experiments

| Locus                                  | Primer sets                                                                   |
|----------------------------------------|-------------------------------------------------------------------------------|
| Ifng promoter<br>(Yu et al, 2007)      | ACCCCAAATGGTGTGAAGTAAAA<br>CCCACCTGTGCCATTCTTGT<br>TGCTTTCAGAGAATCC           |
| Ifng +20<br>(Chang and Aune, 2007)     | GGCCTGATTCACACCCA<br>CCCAAGAAGAAGCAGAAATCAA                                   |
| Ifng 40609<br>(Schoenborn et al, 2007) | AGCAATGCATTACAAAGACAGAGC<br>GCATGATGTTCTAGAGTGGAGAGC                          |
| Xcl1 promoter                          | GAAGAATGTGGAGCAGACTCCCCAGGAG<br>CATCATTGCAAAGACTTTCGGTGATTCC                  |
| Il4 promoter                           | CTTCAACCTAGCCCAGAACC<br>GTAGGGTTGCCACTGGCTCT                                  |
| Cd4 intron                             | AGCCACTGAACCACAAGGGTCGCTTAG<br>ACACCCTCCTCTGTTGCCTAGCTTCG                     |
| Hlx1 promoter (CNS 3)                  | GGAATGACAGCTCCGAATAAAACT<br>TCACCAGAGCTGCTCCAAGA<br>ATTTGTGGTCTGCCCTCCTCCTGGC |
| Furin promoter<br>(Yu et al, 2007)     | GAAAGGCTGGCAGGAGAAGA<br>TAGCCAGACCCCTGAAGGC<br>TGTGCCTGGGTTGC                 |
| Il18r1 promoter<br>(Yu et al, 2007)    | TGAGATCCAGGCAGGAGAACTC<br>AGAGCTCCACAGTTCCCAGAAC<br>CTCTATCGCCTCAGCG          |

Where two primers are indicated, analysis was performed by SYBR green. Where three primers are indicated, analysis was performed as TaqMan assay (top primer-6FAM-labeled reporter, middle primer-reverse quencher, bottom primer-TaqMan probe). Primers used in previous reports are noted with the appropriate reference.

Figure S1

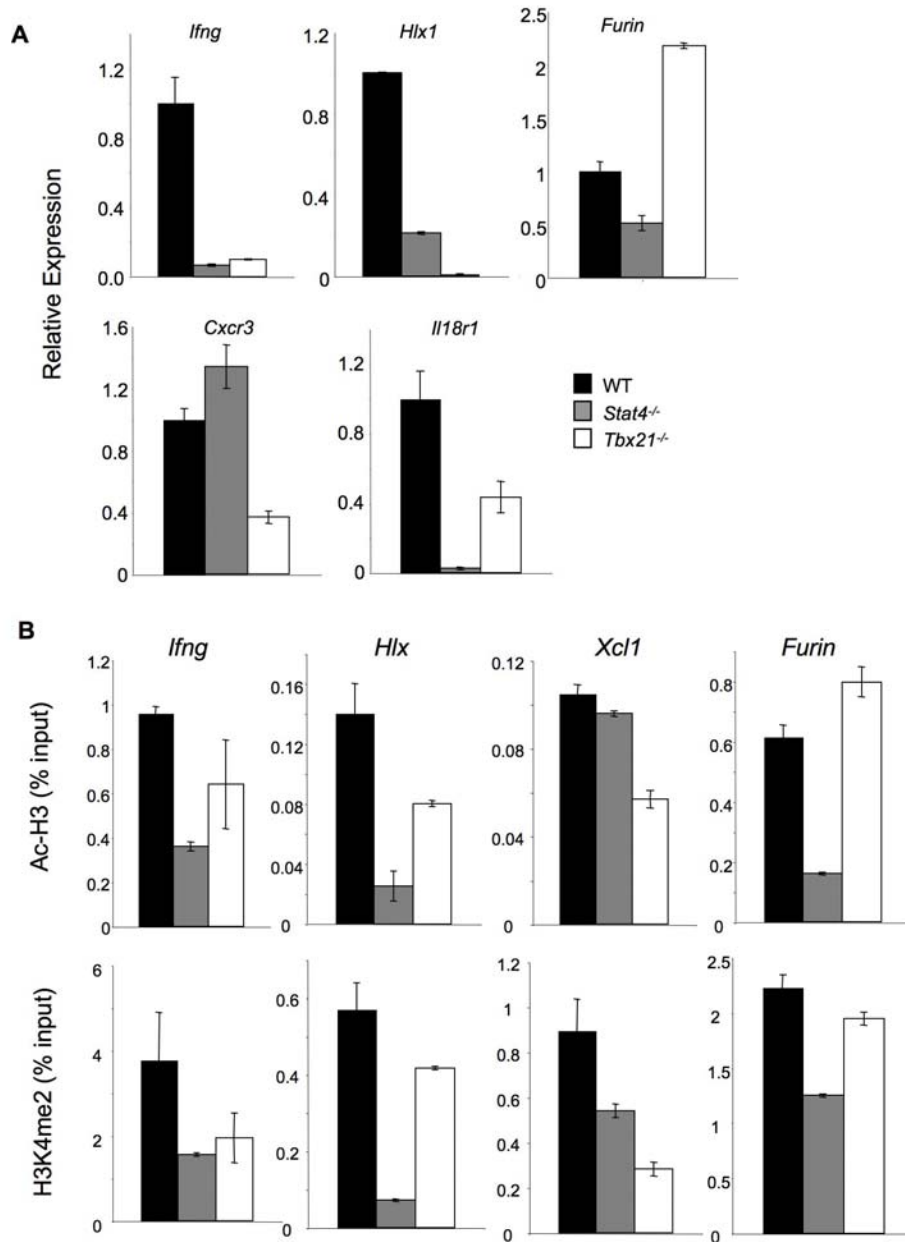

Supplementary Fig 1. Analysis of naïve cells. Naïve (CD4<sup>+</sup> CD62L<sup>+</sup>) T cells from wild type, Stat4<sup>-/-</sup> and T-bet-deficient mice were differentiated in Th1 priming conditions. A, Gene expression was analyzed as described in Figure 1. B, Chromatin modifications were analyzed as described in Figures 4 and 5.

Figure S2

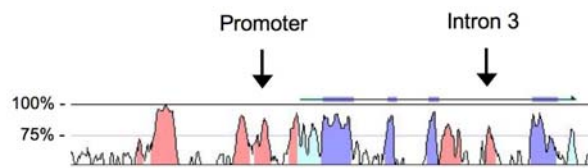

Supplementary Fig 2. VISTA analysis of the Hlx1 gene. Purple regions are coding exons. Light blue regions are untranslated exons. Pink regions are conserved non-coding regions. Arrows indicate primers used in this study for ChIP analysis.

Figure S3

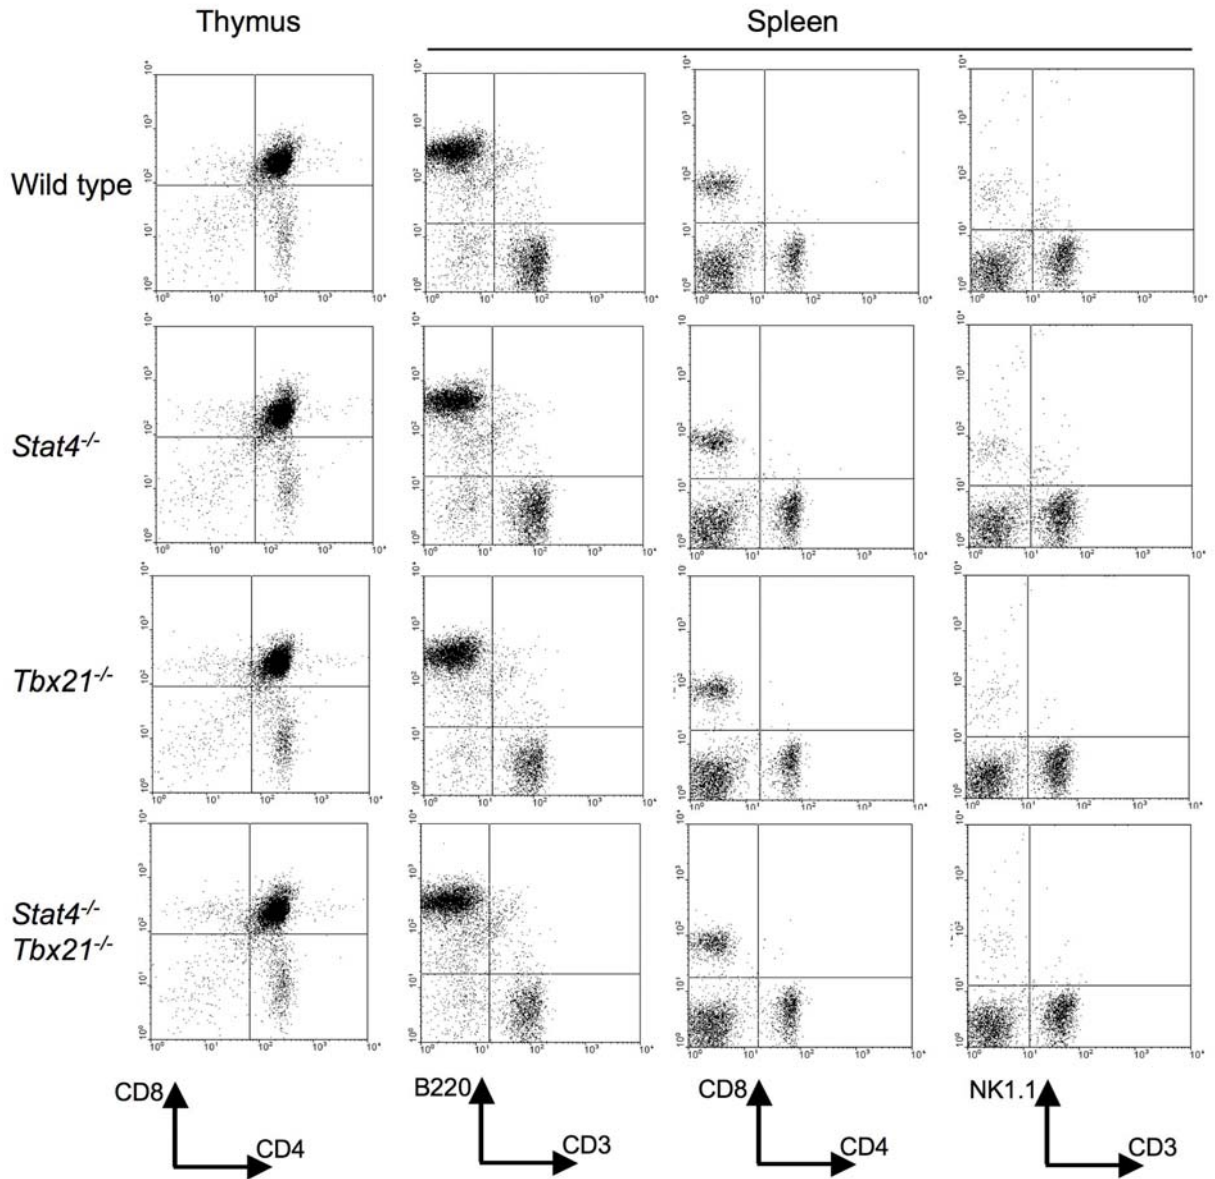

Supplementary Fig 3. Flow cytometric analysis of lymphocyte populations in *Stat4*<sup>-/-</sup>, T-bet- and double-deficient mice. Single cell suspensions of the indicated tissues were stained with the indicated antibodies. All lymphocyte populations appear normal except the previously documented decrease in NK and NKT cells in mice lacking T-bet. This deficiency is not further affected by simultaneous deficiency in T-bet and *Stat4*.
